# Supplementary material
Source: publisher figshare collection journal article supplement (https://frontiersin.figshare.com/ndownloader/files/35846468)
Supplement: Supplementary file 1 [file 35846468]

## Sheet: Sheet1
	Blue Carbon Component	Data Available	Source References	Limitations / Unknowns
	Tidal marsh, mud flats and terrestrial input			● No spatial data on distribution of tidal marsh, mud flats and estuaries ● No quantification of the impact and fate of terrestrial C into the ocean
	Kelp forest (Stock & sequestration potential)	● Satellite-derived spatial distribution of Macrocystis pyrifera	● Golding et al 2019; Mora-Soto et al 2020; Jayathilake & Costello, 2020	● Full spatial extent of Lessonia spp. kelp species unknown
		● Density of kelps (sporadic dive surveys)	● SMSG, 2021; OBIS, 2021	● Full depth distribution unknown for all kelps
		● Plant biomass and dry weight by species	● van Tussenbroek, 1993; Tala & Edding, 2007	● No modelled habitat distribution for any kelps
		● Carbon content of kelp species	● Reed & Bzezinski, 2009	● Existing studies assume health condition to be homogenous throughout extent
		● Global estimates of NPP for giant kelp forest	● Rassweiler et al, 2018; Reed & Bzezinski, 2009	● Biomass and carbon content assumed and likely highly variable
		● Global estimates of annual DOC and POC burial / remineralisation / sequestration from macro-algae	● Krause-Jensen & Duarte 2016	● Location and composition of surrounding sediment not mapped
				● Species-specific sequestration rates unknown
	plankton and pelagic organisms	● Broadscale satellite-derived spatial distribution of phytoplankton	● NOAA / NASA ocean colour datasets, 2021	● Limited resolution of up to 4 m ● Limited ground truthing of diversity or vertical extent ● Difficulty discerning between micro / macro-algae
		● Seasonal diversity and abundance of surface plankton (limited number of bongo net trawls)	●Falkland Islands Government Fisheries Department, 2021	● Limited coverage, time span, and depth distribution of samples
		●Yearly commercial fisheries catch data (long-term data)	●Falkland Islands Government Fisheries Department, 2021	● Limited to current commercially caught fisheries species
		●Density of shallow marine fish and benthos (sporadic dive surveys	● SMSG, 2021	● Density of deep-water / mesophotic marine fish and benthos relatively unknown throughout the area
		●Density of marine mammals and seabirds (at sea spatial monitoring across the Falkland Islands)	● Baylis et al. 2021 and http://seabirdtracking.org/mapper/index.php	● Limited data for many marine mammal and seabird species
	Mesophotic zone (30 - 150 meters)	● Shallow Water Marine Surveys Group (SMSG) observations for divable depths only (above 20m)	● https://www.smsg-falklands.org/publications	● No spatial data on distributions below divable depths, and the infrastructure to explore these environments with SCUBA is undeniable presently due to the remote location and lack of medical assistance in an emergency
		● 202 OBIS Records from In areas of 30 m or less, which is c. 8% of all available VME records ● Using the definition of upper mesophotic (30-60 m) there are 14 OBIS VME records ● In the middle mesophotic (60-90 m) there are 205 OBIS VME records ● In the lower mesophotic zone there are 423 OBIS VME records	● OBIS VME data	●These data only provide information on the presence of certain taxa, mostly identified in imagery and do not inform quantitative surveys to inform baseline or ongoing research. Specimens are rarely collected due to sampling limitations ●Of all the OBIS VME records, 26% are found in the mesophotic, and in the upper levels (30-60m) c. 0.5% of all OBIS VME records. However, 29% (c. 700 records) of …
		●Observation records from SAERI MSP and MMA project for Bird Island, Beauchane	●MMA project meta data and imagery in the SAERI data portal: https://www.south-atlantic-research.org/research/data-science/metadata-how-it-works/	●These data only provide information on the presence of certain taxa, identified in imagery and do not inform quantitative surveys to inform baseline or ongoing research. ● Specimens are rarely collected due to sampling limitations and a lack of resources for curation
	Seafloor (carbon storage and sequestration potential)	● Environmental data layers for the FICZ are available from regional or global models for bathymetry, substrates and oceanographic properties	● GEBCO, GLOBAL Ocean Sea Physical Analysis and Forecasting Products, Global Ocean Biogeochemistry Hindcast model, Bio-ORACLE and dbSEABED	● Low resolution environmental data outputs do not capture the scale and species spatial patterns which leads to inaccuracies and/or over prediction of habitat extents
		● Fisheries bycatch records to determine invertebrate distributions	● FI Fisheries reports dating back to 1986: https://www.falklands.gov.fk/fisheries/	● Bycatch records used to develop predictive VME taxa models introduce uncertainty into predicted location and extent of key sequesters (e.g., corals, bryozoans), and provides only presence data
		● Bathymetry data at variable spatial scales	● GEBCO bathy covers the Falklands and is openly available (GEBCO COMPILATION GROUP, 2020), SRTM30 Plus Bathymetry (http://topex.ucsd.edu/WWW_html/srtm30_plus.html). Raw bathymetry data from different cruises (e.g. Polarstern, JCR, Palmer, Merian) on PANGAEA.	● Deep-sea bathymetry collected at hi resolution over small spatial scales to support oil and gas surveys is under commercial licence and bathymetry collected during research voyages is often unprocessed (Raw) and requires costly and specialised input for use in marine spatial planning
		● Marine sediment classification records (from neighbouring geographic regions)	● dbsSEABED: Information Integration System for Marine Substrates (Jenkins, 2019) http://instaar.colorado.edu/~jenkinsc/dbseabed
			● Soft sediments on the shelf (Parker et al. 1997, Petschick et al. 1996, Servicio de Hidrografia, Gerdes & Montiel 1999)
		● Carbon stock predictor variables for the Falklands Conservation Zones	● PANGAEA, https://www.pangaea.de/ and MOSAIC, http://mosaic.ethz.ch/	● Data is limited
		● Published global maps of organic carbon content and stock	content (Lee et al., 2019) and stock (Atwood et al., 2020; Sala et al. 2021)	● Sala et al. 2021: 50 km resolution (low spatial resolution for the Falklands) although it does indicate that this region is the top 5-10% of oceans for carbon protection
		● Carbon content and production estimated from seafloor core sampling (from neighbouring geographic regions)	● Magellan Region and Eastern Weddell Sea (Brey & Gerdes 1999), Zwerschke et al. (2021) cores compared with seabed images	● Ground-truthing data for the Falklands is needed, and currently only available for the continental shelf
		● Invertebrate distribution records	● OBIS quality checked records (January 2022) & additionals from SAERI (need to add details) for the Falkland Islands MMA. VME taxa were selected based on CCAMLR VME definitions	● Ground-truthing data for the Falklands is needed, and currently only available based on comparable studies in Antarctic regions
				● Non-standardised taxon designations (low level taxonomic resolution), multiple errors and lacks taxonomic ground truthing
				● Data doesn’t quantify seafloor impacts/damage, and records often don't have depth or seafloor data recorded
		● Global data on fishing effort	● Fisheries bycatch records, oil and gas reports and VME project Data (Pearman et al., in prep) and global datasets such as OBIS	● Data compilation incomplete
			● Global fishing watch https://globalfishingwatch.org/	● Provides a visual overview, but lacks ground truthing
		● Metadata records	● SAERI data portal: https://www.south-atlantic-research.org/research/data-science/metadata-how-it-works/	● Data is not easily discoverable, and metadata is not always curated or up to date within research time frames, data may not be publically available and researchers lag behind in their metadata submissions post-field work in the Falkland Islands
